# Supplementary material for: Autonomous Inhibition of Apoptosis Correlates with Responsiveness of Colon Carcinoma Cell Lines to Ciglitazone
Source: PubMed Central journal article supplement (PMC4263530; doi:10.1371/journal.pone.0114158), 2014-12-11

# Supporting Information Figure 1

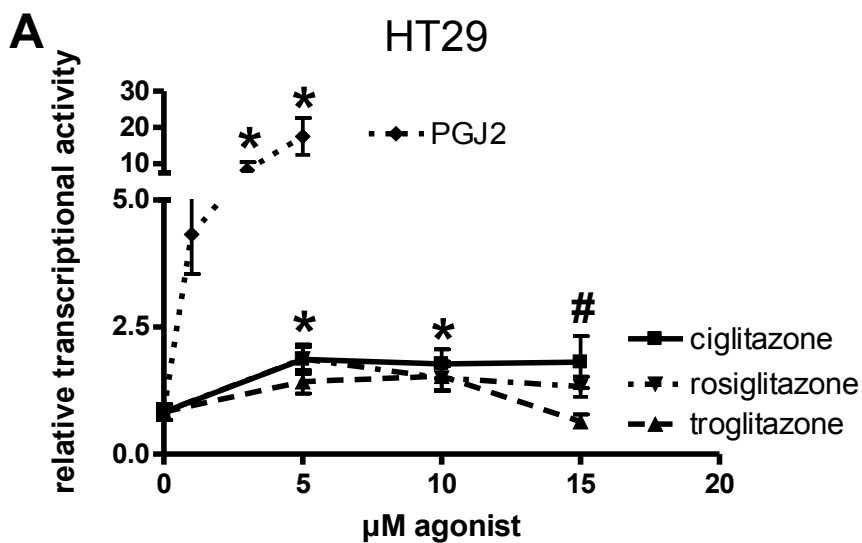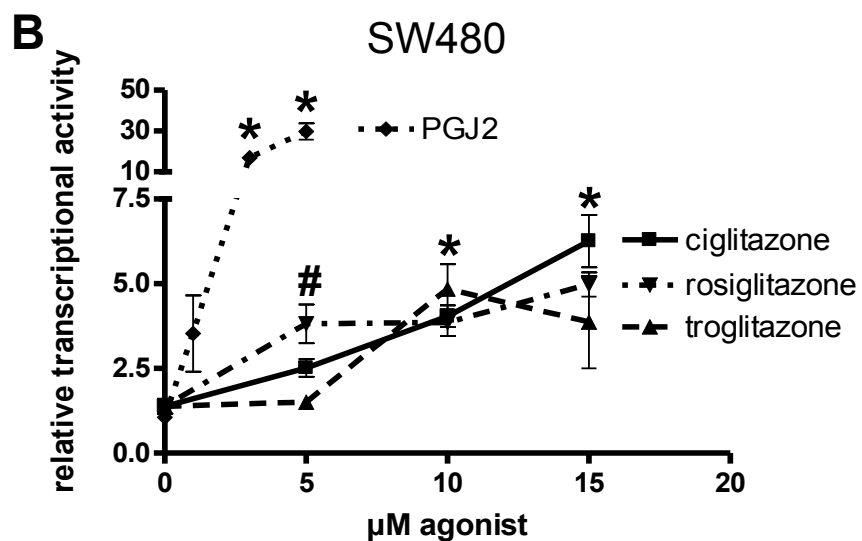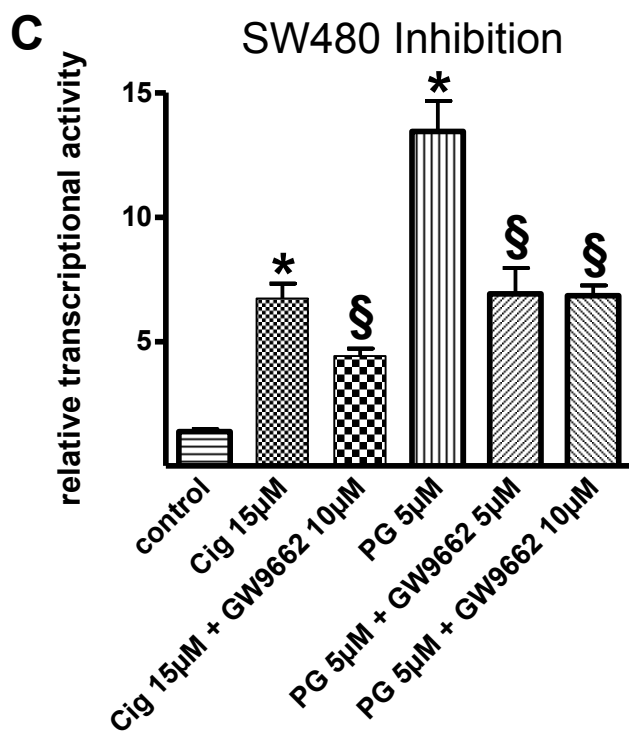

Supplement: pone.0114158.s001.pdf [file pone.0114158.s001.pdf]
